# Supplementary material for: Synthesis, sintering by Cool-SPS and characterization of A2Cu(CO3)2 (A = K, Na): evidence for multiferroic and magnetoelectric cupricarbonates
Source: Royal Society of Chemistry journal article supplement (doi:10.1039/d0dt00814a), 2020-01-01
Supplement: d0dt00814a1.pdf [file d0dt00814a1.pdf]

## Synthesis, sintering by Cool-SPS and characterization of $A_2Cu(CO_3)_2$ (A = K, Na): evidences for multiferroic and magnetoelectric cupricarbonates

### Supplementary data

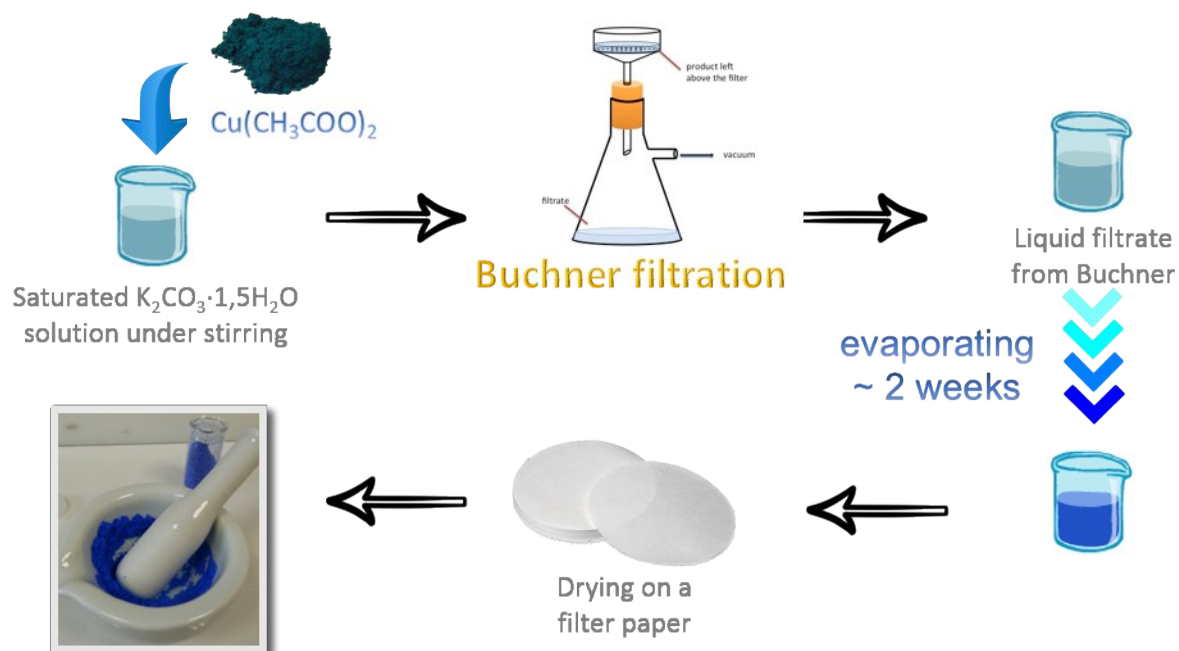

Figure S1: Schematic representation of the synthesis method for  $K_2Cu(CO_3)_2$  powder

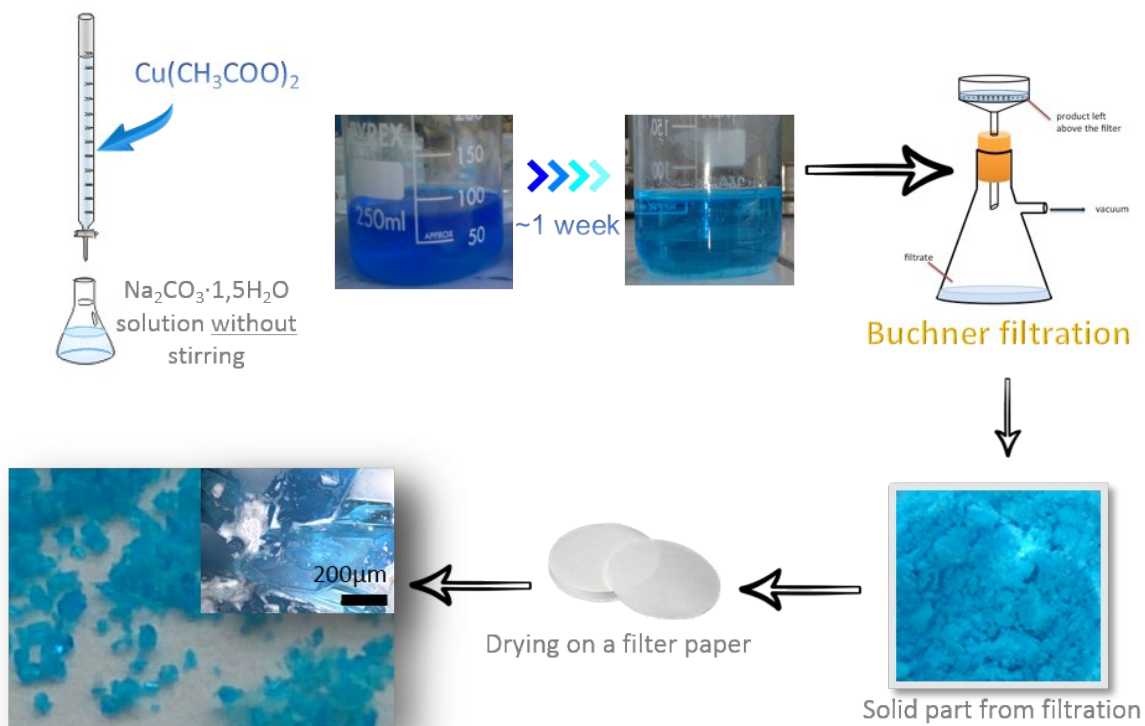

Figure S2: Schematic representation of the synthesis of  $Na_2Cu(CO_3)_2 \cdot 3H_2O$

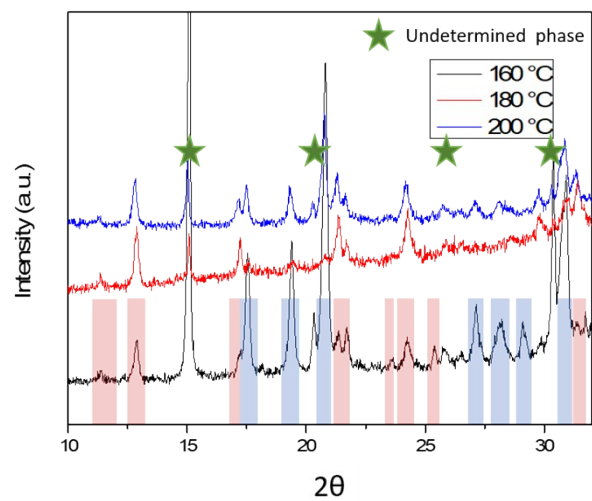

Figure S3: XRD patterns of powders of  $\text{Na}_2\text{Cu}(\text{CO}_3)_2 \cdot 3\text{H}_2\text{O}$  composition fired at various temperatures from 160 to 200 °C. Red parts represent the anhydrous phase peak positions and blue part represents the hydrated phase peak positions
